# Supplementary material
Source: PubMed Central journal article supplement (PMC4130804)

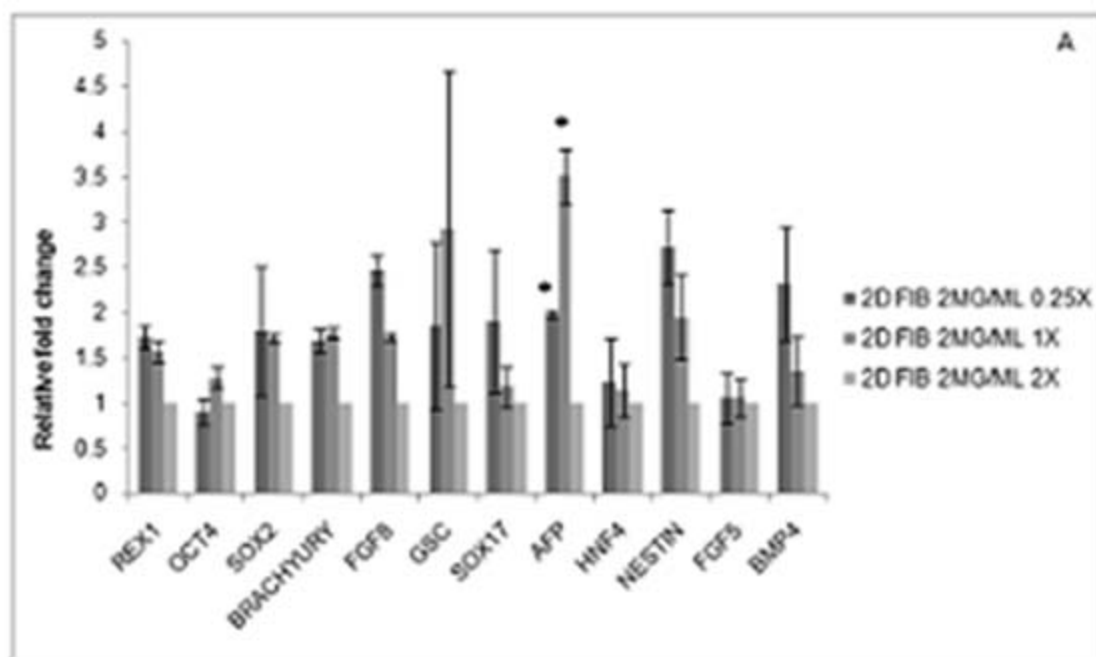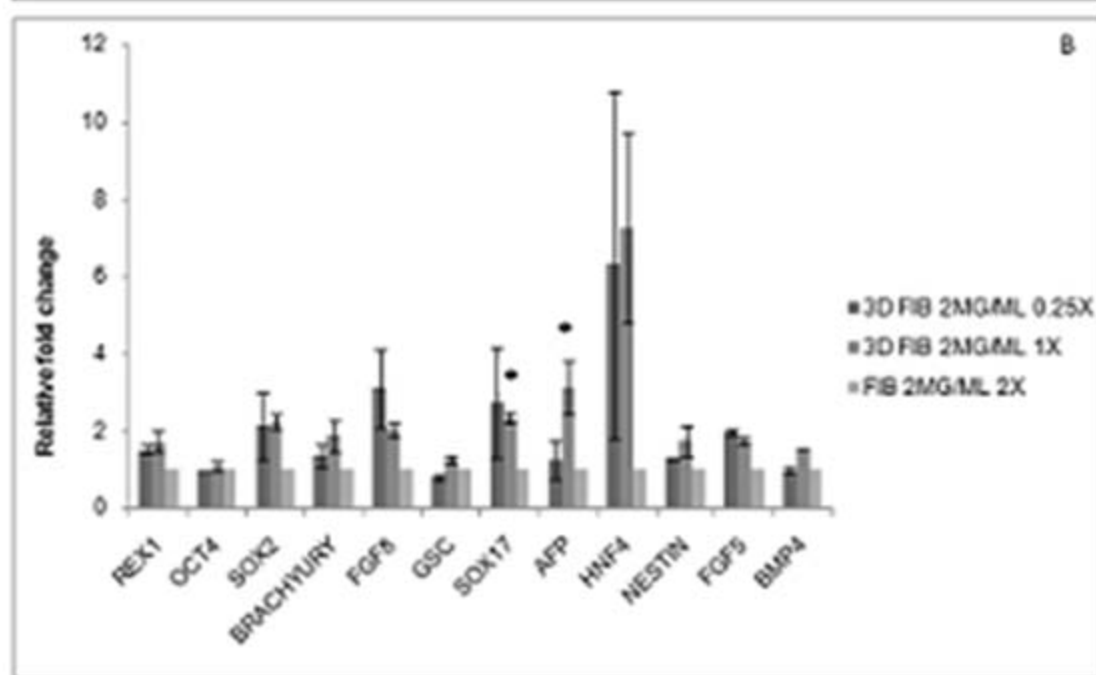

Supplementary Figure 1.

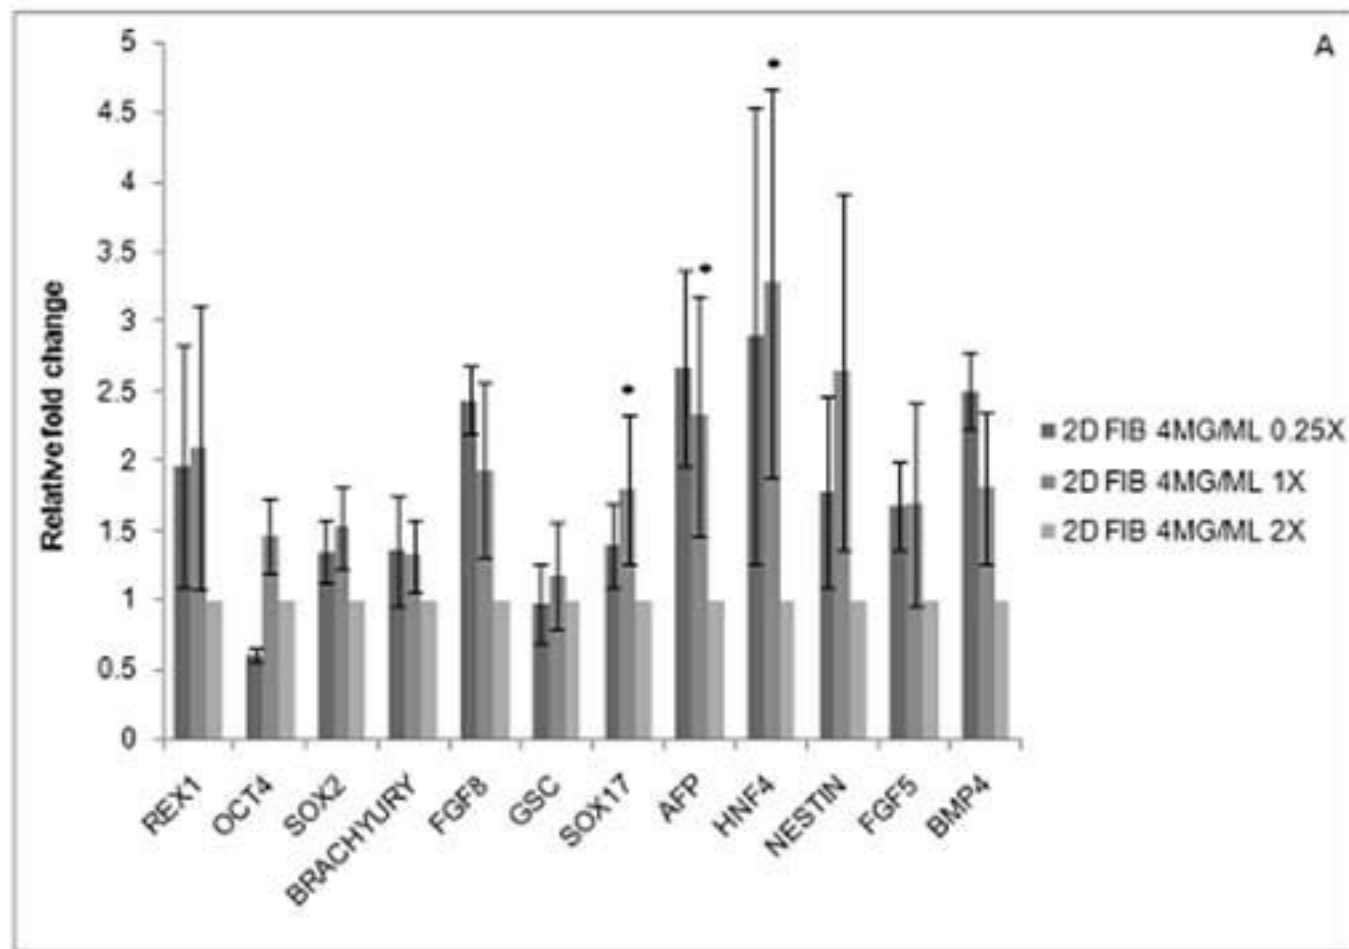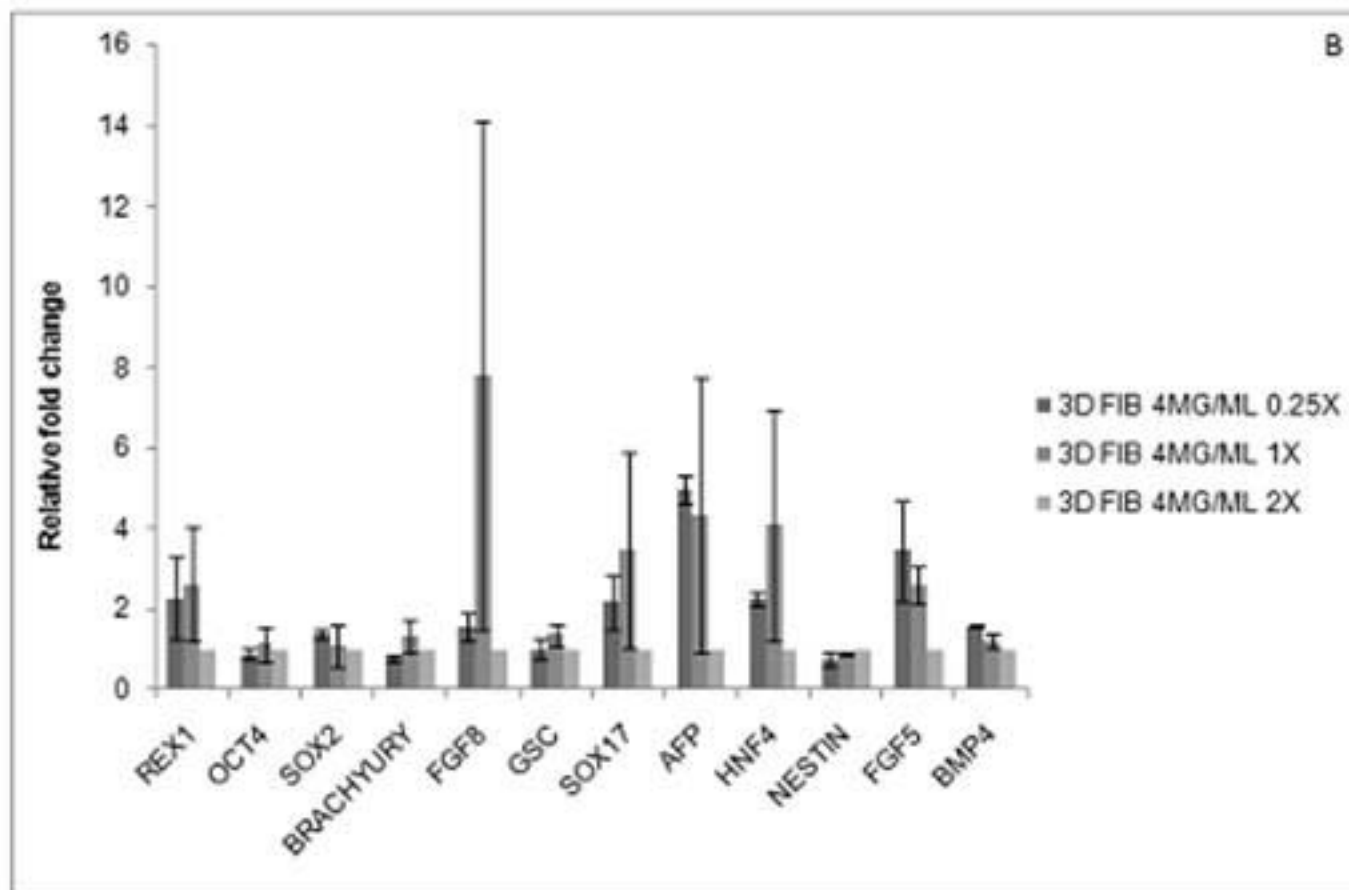

Supplementary Figure 2.

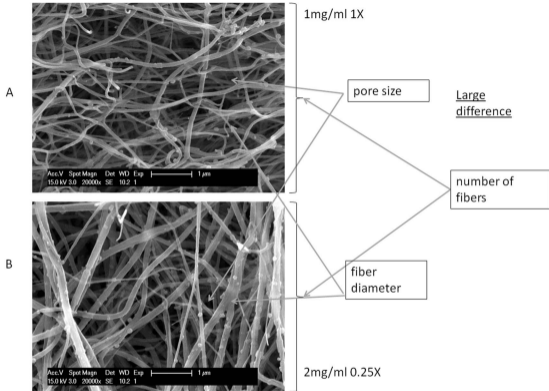

Supplementary Figure 3.

Supplement: NIHMS618237-supplement-Supp_FigureS1-S3.pdf [file NIHMS618237-supplement-Supp_FigureS1-S3.pdf]
